# Supplementary material for: Influence of titanium elastic nail pre-contouring on fracture reduction of paediatric diaphyseal forearm fractures
Source: Research Square preprint supplement (doi:10.21203/rs.3.rs-8193814/v1), 2025-12-08
Supplement: Supplementary file 1 [file b9cc529a11c09660036aec99.docx]

**Table 1:** Outcome measures for RLy, RLx, MRB, LMRB, MRB%, UA and RA in each separate group with either 2 straight nails (Group 1), 1 straight and 1 curved nail (Group 2) or with 2 curved nails (Group 3) and relevant state (intact or instrumented), presented in terms of mean value and standard deviation. *Indicates significant difference.

| Parameter | State |  | Group |  | p-value between groups |
| --- | --- | --- | --- | --- | --- |
| **1** | **2** | **3** |

| RLy (mm) | intact | 201.4 (19.5) | 201.4 (19.5) | 202.7 (18.3) | 0.126 | |
| --- | --- | --- | --- | --- | --- | --- |
| instrumented | 201.7 (19.5) | 201.5 (19.8) | 202.9 (17.5) | 0.395 | |
| p-value intact-instrumented | 0.997 | 0.998 | 0.996 |  |  |
| RLx (mm) | intact | 120.7 (11.3) | 120.7 (11.3) | 121.0 (10.6) | 0.113 | |
| instrumented | 126.3 (21.0) | 116.8 (9.4) | 116.7 (9.3) | 0.239 | |
| p-value intact-instrumented | 0.462 | 0.308 | 0.279 |  |  |
| MRB (mm) | intact | 13.9  (2.1) | 13.9 (2.1) | 14.1 (2.1) | 0.55 | |
| instrumented | 10.2  (1.4) | 15.8 (2.1) | 14.8 (2.2) | **<0.001*** | |
| p-value intact-instrumented | **0.003*** | **<0.001*** | 0.113 |  |  |
| LMRB (mm) | intact | 59.9  (0.8) | 59.9 (0.8) | 59.7 (1.1) | 0.626 | |
| instrumented | 62.6  (8.2) | 58.1 (3.2) | 57.7 (4.8) | 0.214 | |
| p-value intact-instrumented | 0.459 | 0.213 | 0.272 |  |  |
| MRB% (%) | intact | 6.9  (0.7) | 6.9  (0.7) | 6.9  (0.8) | 0.207 | |
| instrumented | 5.1  (0.3) | 7.8  (0.7) | 7.3  (0.9) | **<0.001*** | |
| p-value intact-instrumented | **0.003*** | **<0.001*** | 0.068 |  |  |

| UA (°) | instrumented | 2.4  (3.6) | 1.9  (2.1) | 3.2  (2.3) | 0.636 |
| --- | --- | --- | --- | --- | --- |
| RA (°) | instrumented | 2.1  (2.8) | 8.3  (3.5) | 5.3  (2.4) | **0.001*** |
